# Supplementary material
Source: MDPI journal article supplement (https://www.mdpi.com/2071-1050/12/3/1188)

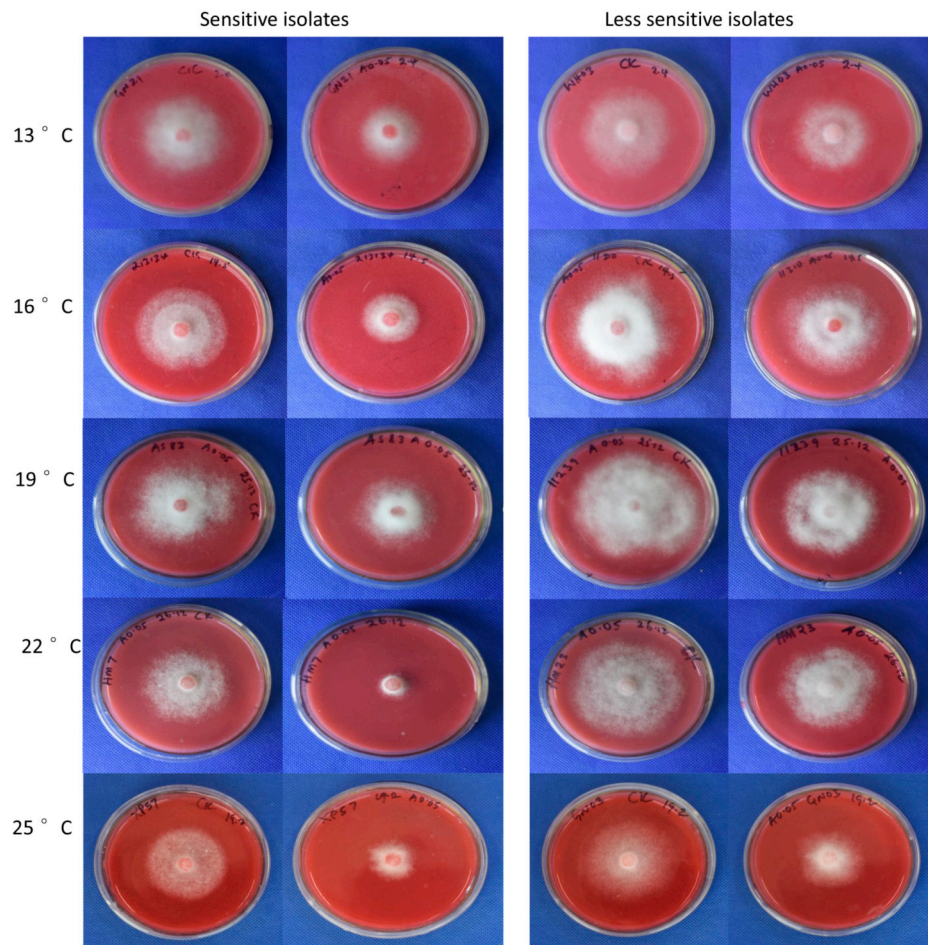

Supplement: s1 [file s1]
